# Supplementary material for: A multiplexed microflow LC–MS/MS-PRM assay for serologic quantification of IgG N- and HPX O- glycoforms in liver fibrosis
Source: PubMed Central journal article supplement (PMC9837073; doi:10.1038/s41598-023-27382-0), 2023-01-12
Supplement: 41598_2023_27382_MOESM1_ESM.pdf [file 41598_2023_27382_MOESM1_ESM.pdf]

Table S1. Basic information on samples analyzed in this study.

| ID            | Disease Group | FEMALE | Age | Race | FIBRO_ISHAK_S00 | FIBRO_ISHAK_M24 | FIBRO_ISHAK_M48 |
|---------------|---------------|--------|-----|------|-----------------|-----------------|-----------------|
| 34916         | CIR           | 0      | 52  | 1    | 6               | 5               | 5               |
| 35018         | CIR           | 0      | 51  | 1    | 5               | 5               | 6               |
| 35027         | CIR           | 0      | 56  | 1    | 5               | 5               | 6               |
| 35036         | CIR           | 0      | 49  | 1    | 5               | 3               | 6               |
| 35060         | CIR           | 0      | 58  | 1    | 5               | 3               | 6               |
| 35066         | CIR           | 0      | 59  | 1    | 6               | 6               | 5               |
| 35074         | CIR           | 0      | 48  | 2    | 6               | 5               | 6               |
| 35083         | CIR           | 0      | 47  | 1    | 6               | 6               |                 |
| 35089         | CIR           | 1      | 54  | 1    | 5               | 6               | 6               |
| 35094         | CIR           | 0      | 47  | 2    | 5               | 5               | 5               |
| 35150         | CIR           | 0      | 51  | 1    | 6               | 6               | 6               |
| 35153         | CIR           | 1      | 55  | 1    | 6               | 5               |                 |
| 35165         | CIR           | 1      | 53  | 1    | 6               | 6               | 6               |
| 35166         | CIR           | 1      | 57  | 2    | 6               | 6               | 6               |
| 35181         | CIR           | 0      | 45  | 1    | 6               | 6               | 5               |
|               |               |        |     | AVG  | 5.6             | 5.2             | 5.69            |
|               |               |        |     |      |                 |                 |                 |
| 34926         | FIB           | 0      | 47  | 1    | 3               | 3               | 3               |
| 34946         | FIB           | 1      | 40  | 1    | 3               | 3               | 3               |
| 34958         | FIB           | 0      | 47  | 1    | 4               | 3               | 3               |
| 34967         | FIB           | 1      | 65  | 1    | 3               | 3               | 3               |
| 34973         | FIB           | 1      | 53  | 1    | 4               | 4               | 2               |
| 34994         | FIB           | 0      | 49  | 1    | 3               | 2               | 2               |
| 35008         | FIB           | 0      | 55  | 1    | 4               | 4               | 4               |
| 35016         | FIB           | 0      | 41  | 1    | 3               |                 | 4               |
| 35033         | FIB           | 0      | 51  | 1    | 4               | 4               | 3               |
| 35051         | FIB           | 0      | 55  | 2    | 3               | 4               | 4               |
| 35062         | FIB           | 0      | 44  | 1    | 3               | 2               | 2               |
| 35077         | FIB           | 0      | 42  | 1    | 4               | 3               | 3               |
| 35080         | FIB           | 0      | 47  | 2    | 3               | 1               | 2               |
| 35082         | FIB           | 0      | 45  | 1    | 4               | 3               | 3               |
| 35098         | FIB           | 1      | 50  | 2    | 3               | 4               | 4               |
|               |               |        |     | AVG  | 3.4             | 3.07            | 3               |
| Control Group |               |        |     |      |                 |                 |                 |
| 14758         | CTRL          | 0      | 50  | 1    |                 |                 |                 |
| 13692         | CTRL          | 0      | 51  | 1    |                 |                 |                 |
| 15962         | CTRL          | 0      | 53  | 1    |                 |                 |                 |
| 20917         | CTRL          | 0      | 46  | 1    |                 |                 |                 |

|       |        |                  |          |             |                |                       |  |
|-------|--------|------------------|----------|-------------|----------------|-----------------------|--|
| 20919 | CTRL   | 0                | 46       | 1           |                |                       |  |
| 13686 | CTRL   | 0                | 46       | 1           |                |                       |  |
| 16020 | CTRL   | 0                | 47       | 1           |                |                       |  |
| 13472 | CTRL   | 0                | 47       | 1           |                |                       |  |
| 20913 | CTRL   | 0                | 48       | 1           |                |                       |  |
| 20895 | CTRL   | 0                | 56       | 2           |                |                       |  |
| 20912 | CTRL   | 0                | 57       | 2           |                |                       |  |
| 20908 | CTRL   | 1                | 54       | 1           |                |                       |  |
| 16970 | CTRL   | 1                | 57       | 1           |                |                       |  |
| 14809 | CTRL   | 1                | 57       | 1           |                |                       |  |
| 20887 | CTRL   | 1                | 43       | 2           |                |                       |  |
|       |        |                  |          |             |                |                       |  |
|       |        |                  | Mean Age | Male Gender | Race Caucasian | Race African American |  |
|       | Age    | CTRL (n=15)      | 51       | 11          | 12             | 3                     |  |
|       |        | Fibrosis (n=15)  | 49       | 11          | 12             | 3                     |  |
|       |        | Cirrhosis (n=15) | 52       | 11          | 12             | 3                     |  |
|       | Gender | Female           | 4        |             |                |                       |  |
|       |        | Male             | 11       |             |                |                       |  |
|       | Race   | White            | 12       |             |                |                       |  |
|       |        | Black            | 3        |             |                |                       |  |

Table S2. Statistical results showing probabilistic values of association of analytes and the sample groups

| Marker | T-test (Mann Whitney) |                 |                |
|--------|-----------------------|-----------------|----------------|
|        | CTRL vs FIB           | CTRL vs CIR     | FIB vs CIR     |
| G0     | 0.006 (0.003)         | 0.001 (0.001)   | 0.106 (0.187)  |
| G0F    | <0.001 (0.003)        | <0.001 (<0.001) | 0.161 (0.250)  |
| G1     | 0.068 (0.148)         | 0.001 (0.001)   | 0.023 (0.023)  |
| G0N    | 0.007 (0.011)         | <0.001 (<0.001) | 0.084 (0.149)  |
| G1F    | 0.077 (0.202)         | 0.004 (0.003)   | 0.068 (0.074)  |
| G1N    | 0.421 (0.512)         | 0.017 (0.030)   | 0.050 (0.126)  |
| G0FN   | <0.001 (<0.001)       | <0.001 (<0.001) | 0.205 (0.089)  |
| G1FN   | 0.003 (0.002)         | <0.001 (<0.001) | 0.092 (0.030)  |
| S-HPX  | 0.062 (0.007)         | <0.001 (<0.001) | 0.011 (<0.001) |

Table S3. AuROC analysis indicates that the abundance of the G0FN and G0F IgG glycoforms separate efficiently the liver fibrosis and control groups, while S-HPX separate the fibrosis and cirrhosis (advanced fibrosis) groups.

| Marker                | AuROC | 95% Confidence interval | p-value <sup>!</sup> | Sensitivity <sup>+</sup> | Specificity <sup>+</sup> |
|-----------------------|-------|-------------------------|----------------------|--------------------------|--------------------------|
| Control vs Fibrosis   |       |                         |                      |                          |                          |
| G0FN                  | 0.92  | 0.826 - 1.00            | < 0.001              | 0.87                     | 0.87                     |
| G0F                   | 0.871 | 0.747 - 0.996           | <0.001               | 0.8                      | 0.8                      |
| G0                    | 0.809 | 0.652 - 0.966           | 0.004                | 0.8                      | 0.73                     |
| G1                    | 0.658 | 0.450 - 0.866           | 0.141                | 0.8                      | 0.67                     |
| G1F                   | 0.64  | 0.438 - 0.843           | 0.191                | 0.67                     | 0.6                      |
| G1N                   | 0.573 | 0.359 - 0.788           | 0.494                | 0.67                     | 0.6                      |
| G1FN                  | 0.818 | 0.668 - 0.967           | 0.003                | 0.53                     | 1                        |
| G0N                   | 0.769 | 0.600 - 0.938           | 0.012                | 0.47                     | 0.93                     |
| Fibrosis vs Cirrhosis |       |                         |                      |                          |                          |
| S-HPX                 | 0.844 | 0.686-1.00              | 0.001                | 0.87                     | 0.87                     |

! The p-value is from test of the null hypothesis of AuROC=0.5.

+ Sensitivity and specificity were obtained for achieving the maximum Youden's index (sensitivity+specificity)

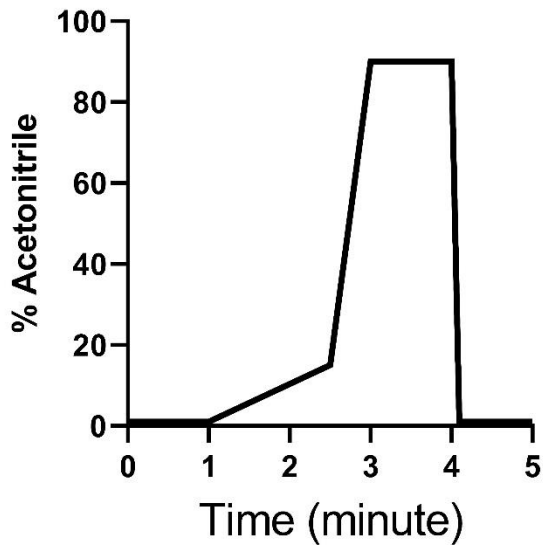

Supplementary Figure S1. Capillary flow gradient profile for LC-MS peptide analysis.

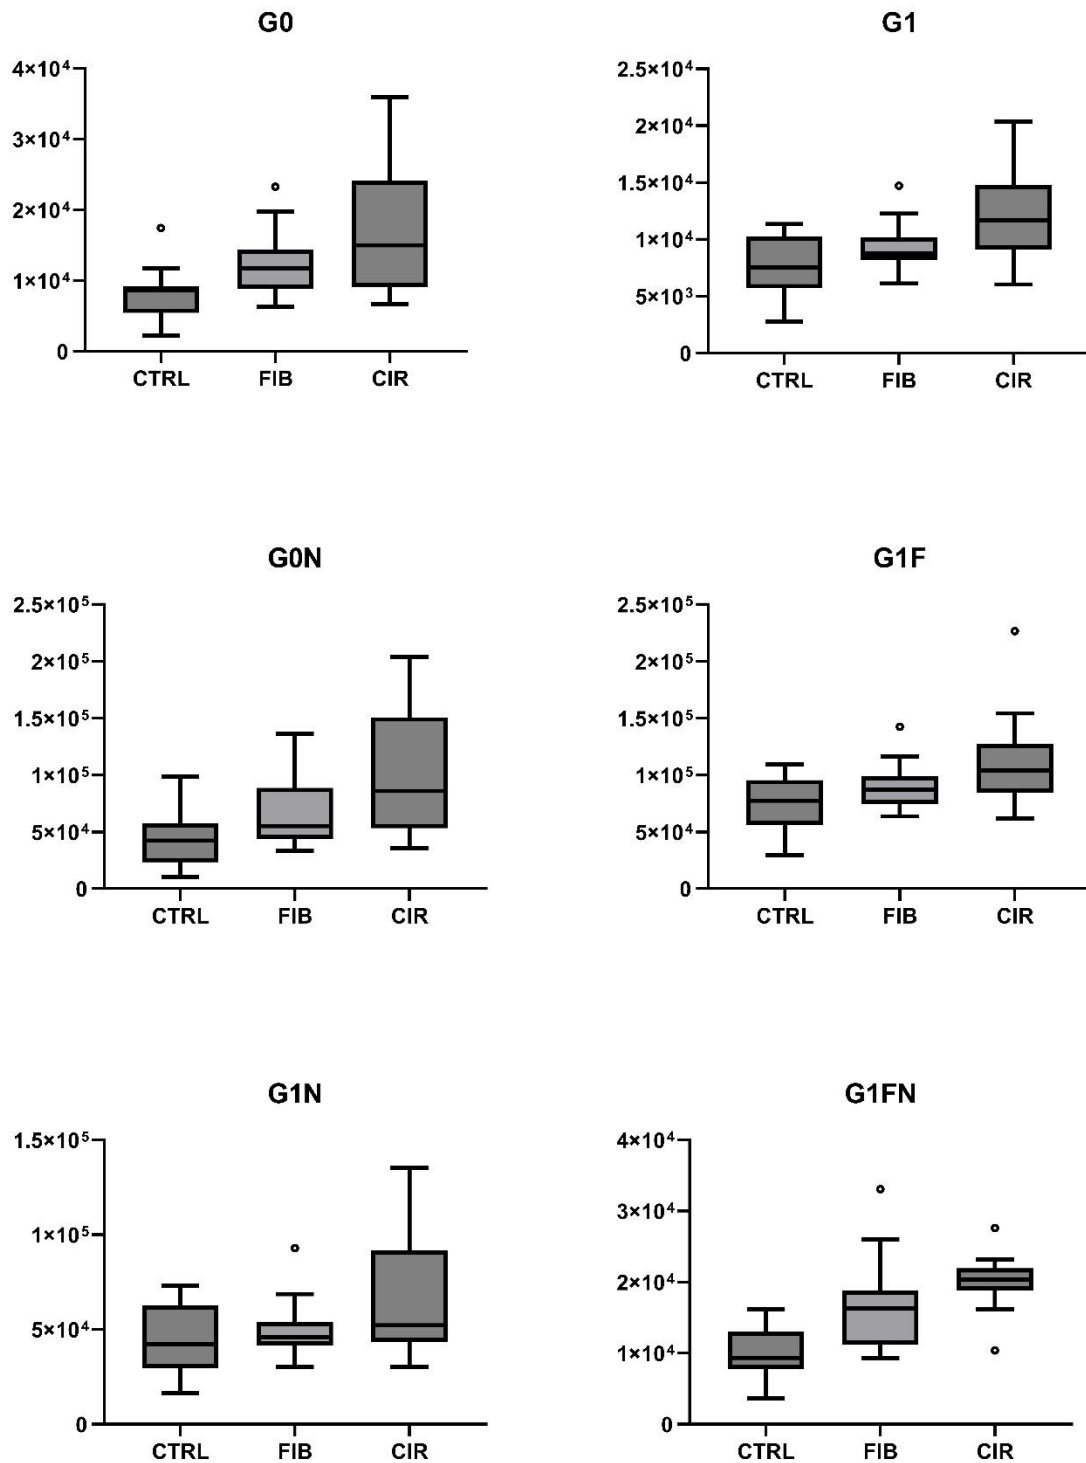

Supplementary Figure S2. Nested tukey plot showing the abundance pattern of indicated IgG glycoforms in control (CTRL n=15), fibrosis (FIB n=15), and cirrhosis (CIR n=15) patients.
